# Supplementary material for: A Smartphone App and Personalized Text Messaging Framework (InDEx) to Monitor and Reduce Alcohol Use in Ex-Serving Personnel: Development and Feasibility Study
Source: PubMed Central journal article supplement (PMC6231744; doi:10.2196/10074), 2018-09-11
Supplement: mhealth_v6i9e10074_app2.pdf [file mhealth_v6i9e10074_app2.pdf]

Multimedia Appendix 2

| <b>Alcohol Category</b> | <b>Alcohol Type (measure)</b>                                                                                                                                                                                               |
|-------------------------|-----------------------------------------------------------------------------------------------------------------------------------------------------------------------------------------------------------------------------|
| Beer                    | Beer (Pint/Half), Shandy (Pint/Half), Ale (Pint/Half), Bitter (Pint/Half)                                                                                                                                                   |
| Wine                    | Red (Large, Medium, Small), White (Large, Medium, Small), Rose (Large, Medium, Small), Prosecco (Glass)                                                                                                                     |
| Cider                   | Cider (Pint/Half)                                                                                                                                                                                                           |
| Cocktail                | Bloody Mary (Glass), Screwdriver (Glass), Martini (Glass), Margarita (Glass), Cosmopolitan (Glass), Mojito (Glass)                                                                                                          |
| Spirits                 | Cognac (Single, Double), Gin (Single, Double), Rum (Single, Double), Vodka (Single, Double), Tequila (Single, Double), Liqueurs (Single, Double), Sambuca (Single, Double), Sours (Single, Double), Others (Single, Double) |
| Alcopops                | WKD (Bottle), Hooch (Bottle), Smirnoff Ice (Bottle)                                                                                                                                                                         |
